# Supplementary material
Source: publisher site journal article supplement (https://www.spandidos-publications.com/1059/downloadSupplementary)

Figure S1. Abnormal expression of SOX2 and BCL11A. Reverse transcription-quantitative PCR was used to measure the relative expression level of (A) SOX2 and (B) BCL11A in MDA-MB-231 and T47D cells transfected with pcDNA3.1, pcDNA3.1-SOX2 or pcDNA3.1-BCL11A. The relative expression level of BCL11A in (C) MDA-MB-231 and (D) T47D cells transfected with shNC, shBCL11A-1, shBCL11A-2 or shBCL11A-3. \* $P < 0.05$ , \*\* $P < 0.01$ , \*\*\* $P < 0.001$  vs. control. sh, short hairpin; NC, negative control; SOX2, SRY (sex determining region Y)-box 2; BCL11A, B-cell lymphoma/leukaemia 11A.

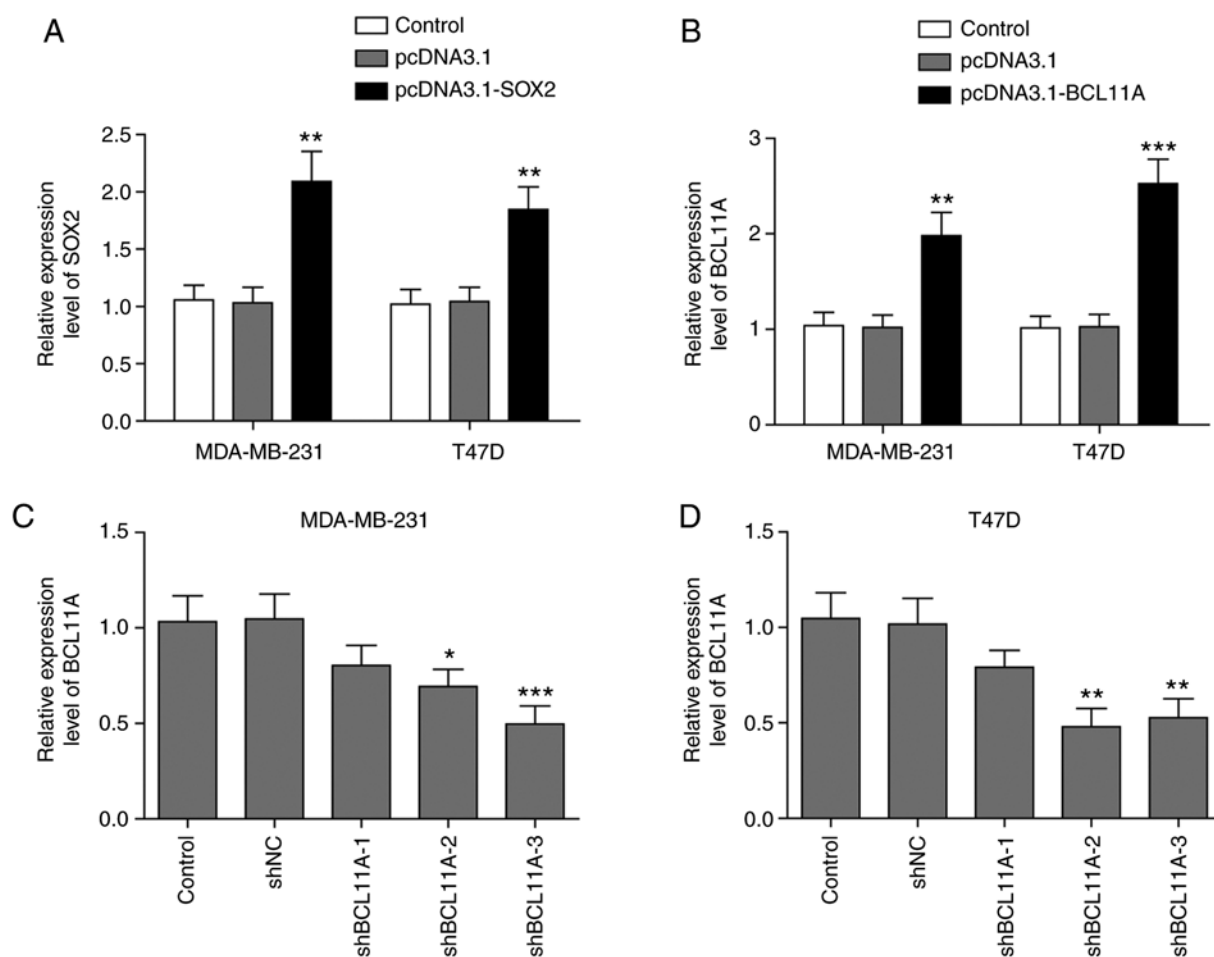

Supplement: Supplementary file 1 [file downloadSupplementary]
